# Supplementary material
Source: publisher site journal article supplement (https://www.spandidos-publications.com/1559/downloadSupplementary)

Figure S1. Effects of PAX6 overexpression on breast cancer cell proliferation. Cell Counting Kit-8 assays were performed to determine the rate of cell proliferation in Ctl-MCF7, PAX6-MCF7, Ctl-MDA-MB-231 and PAX6-MDA-MB-231 stably transfected cell lines. Ctl, empty vector control; OD, optical density; PAX6, paired box 6.

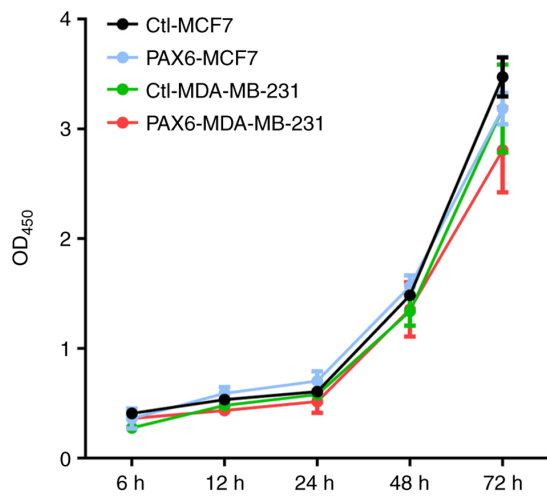

Figure S2. Cell morphology of PAX6-MCF7 and PAX6-MDA-MB-231. No apparent changes were observed in the cell morphology of PAX6-MCF7 and PAX6-MDA-MB-231. Scale bar, 100  $\mu$ m. Ctl, empty vector control; PAX6, paired box 6.

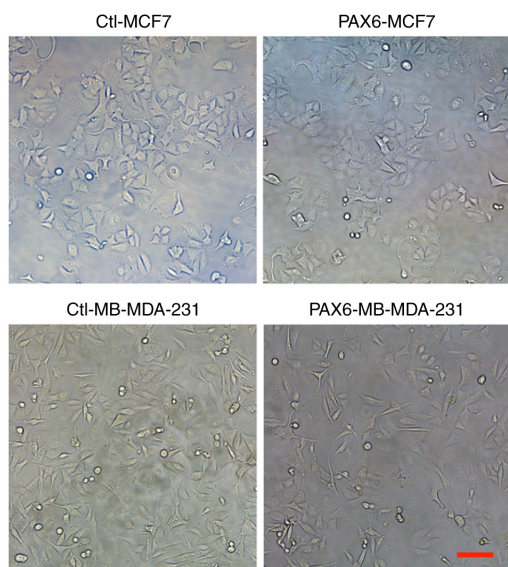

Supplement: Supplementary file 1 [file downloadSupplementary]
